# Supplementary material for: LEAFY COTYLEDON1-CASEIN KINASE I-TCP15-PHYTOCHROME INTERACTING FACTOR4 Network Regulates Somatic Embryogenesis by Regulating Auxin Homeostasis
Source: Oxford University Press journal article supplement (doi:10.1104/pp.15.01480), 2015-10-21
Supplement: plphys_v169_4_2805_s1.zip [file plphys_v169_4_2805_s1.zip]

Archive with 2 entries (2 files):
- PP2015-01480DR1_Supplemental_Material_2tbls.pdf
- PP2015-01480DR1_Supplemental_Material_figs.pdf
