# Supplementary material for: LEAFY COTYLEDON1-CASEIN KINASE I-TCP15-PHYTOCHROME INTERACTING FACTOR4 Network Regulates Somatic Embryogenesis by Regulating Auxin Homeostasis
Source: Oxford University Press journal article supplement (doi:10.1104/pp.15.01480), 2015-10-21
Supplement: plphys_v169_4_2805_s1.zip [file plphys_v169_4_2805_s1.zip › PP2015-01480DR1_Supplemental_Material_2tbls.pdf]

**Table S1.** Oligonucleotides used in this study.

| Primer Name                    | Accession number | Sequences(5'-3')                                                   | Underline       | Destination                       |
|--------------------------------|------------------|--------------------------------------------------------------------|-----------------|-----------------------------------|
| <i>GhCKI-full</i> -F           |                  | ATGGAACCTTGTGTTGGTAATAAG                                           |                 | GhCKI gene cloning                |
| <i>GhCKI-full</i> -R           |                  | TTAATAGTGAATTCCTCGTCGCC                                            |                 |                                   |
| 35S: <i>GhCKI</i> -F           | JQ713826         | <u>CGAGCT</u> CATGGAACCTT GTGTTGGTAATAAG                           | <i>Sac</i> I    | GhCKI Overexpression              |
| 35S: <i>GhCKI</i> -R           |                  | <u>CTCTAGA</u> TTAATAGTGAATTCCTCGTCGC C                            | <i>Xba</i> I    |                                   |
| 35S:i <i>GhCKIv</i> -F         |                  | GGGGACAAGTTTGTACAAAAAAGCAGGCTGGATACGAACACAGTTGACCAATC              | <i>att</i> B1   | Variable region RNAi              |
| 35S:i <i>GhCKIv</i> -R         |                  | GGGGACCAC <u>TTTGTACAAGA</u> AAGCTGGGTTTAAATAGTGAATTCCTCGTCGC      | <i>att</i> B2   |                                   |
| 35S:i <i>GhCKIc</i> -F         |                  | GGGGACAAGTTTGTACAAAAAAGCAGGCTGGATGGAACCTTGTGTTGGTAA                | <i>att</i> B1   | Conserved region RNAi             |
| 35S:i <i>GhCKIc</i> -R         |                  | GGGGACCAC <u>TTTGTACAAGA</u> AAGCTGGGTGCTTCAAAATGGTCCAATCAAA       | <i>att</i> B2   |                                   |
| <i>ProGhCK</i> : <i>GUS</i> -F |                  | GGGGACAAGTTTGTACAAAAAAGCAGGCTGGAAATTAATTTTATAATTACAAAG             | <i>att</i> B1   | Promoter vectors                  |
| <i>ProGhCK</i> : <i>GUS</i> -R |                  | GGGGACCAC <u>TTTGTACAAGA</u> AAGCTGGGTCAATCAACTTCAAAATAAGTAATTTAAA | <i>att</i> B2   |                                   |
| <i>ΔBCD</i> : <i>GUS</i> -F    |                  | GGGGACAAGTTTGTACAAAAAAGCAGGCTGGATCTGGATGTTTATGGGTTGTGCG            | <i>att</i> B1   | Promoter vectors (ΔBCD)           |
| <i>ProGhCK</i> : <i>GUS</i> -R |                  | GGGGACCAC <u>TTTGTACAAGA</u> AAGCTGGGTCAATCAACTTCAAAATAAGTAATTTAAA | <i>att</i> B2   |                                   |
| <i>ΔCD</i> : <i>GUS</i> -F     |                  | GGGGACAAGTTTGTACAAAAAAGCAGGCTGGGCTCGATACGATCAAAATCACCTG            | <i>att</i> B1   | Promoter vectors (ΔCD)            |
| <i>ProGhCK</i> : <i>GUS</i> -R |                  | GGGGACCAC <u>TTTGTACAAGA</u> AAGCTGGGTCAATCAACTTCAAAATAAGTAATTTAAA | <i>att</i> B2   |                                   |
| <i>ΔD</i> : <i>GUS</i> -F      |                  | GGGGACAAGTTTGTACAAAAAAGCAGGCTGGTCCTTAGAGGAACCTTCGCATCC             | <i>att</i> B1   | Promoter vectors (ΔD)             |
| <i>ProGhCK</i> : <i>GUS</i> -R |                  | GGGGACCAC <u>TTTGTACAAGA</u> AAGCTGGGTCAATCAACTTCAAAATAAGTAATTTAAA | <i>att</i> B2   |                                   |
| <i>ProGhCKI-YIH</i> -F         |                  | ATgaattcGGAAATTAATTTTATAATTACAAAGT                                 | <i>Eco</i> RI   | pHisi-1- <i>ProGhCKI</i> vector   |
| <i>ProGhCKI-YIH</i> -R         |                  | CGTCTAGCAATCAACTTCAAAATAAGTAATTTAAAA                               | <i>Xba</i> I    |                                   |
| <i>ProGhCKI A-YIH</i> -F       |                  | ATgaattcATCTGGATGTTTATGGGTTGTGCG                                   | <i>Eco</i> RI   | pHisi-1- <i>ProGhCKI A</i> vector |
| <i>ProGhCKI A-YIH</i> -R       |                  | CGTCTAGCAATCAACTTCAAAATAAGTAATTTAAAA                               | <i>Xba</i> I    |                                   |
| <i>ProGhCKI B-YIH</i> -F       |                  | ATgaattcGCTTCGATACGATCAAAATCACCTG                                  | <i>Eco</i> RI   | pHisi-1- <i>ProGhCKI B</i> vector |
| <i>ProGhCKI B-YIH</i> -R       |                  | CGTCTAGAAAAGAAAAAAATTTAAAGCT                                       | <i>Xba</i> I    |                                   |
| <i>ProGhCKI C-YIH</i> -F       |                  | ATGAATTCCTTATAGAGGAACCTTCGCATCC                                    | <i>Eco</i> RI   | pHisi-1- <i>ProGhCKI C</i> vector |
| <i>ProGhCKI C-YIH</i> -R       |                  | CGTCTAGAAAAGAAAAAAATTTAAAGCT                                       | <i>Xba</i> I    |                                   |
| <i>ProGhCKI D-YIH</i> -F       |                  | ATgaattcGGAATTAATTTTATAATTACAAAGT                                  | <i>Eco</i> RI   | pHisi-1- <i>ProGhCKI D</i> vector |
| <i>ProGhCKI D-YIH</i> -R       |                  | CGTCTAGAAAAGGTTTATTTTCCCG                                          | <i>Xba</i> I    |                                   |
| <i>mProGhCKI-YIH</i> -F        |                  | ATAGAATTATGTTTCGTAGCTATGGGGTCTCTGGGGTTTCTT                         |                 | pHisi-1- <i>mProGhCKI</i> vector  |
| <i>mProGhCKI-YIH</i> -R        |                  | AAGAAAACCCCAAGAGACCCCATAGCTACGAAATCATAATTCAT                       |                 |                                   |
| <i>ProGhCKI B1-EMSA</i> -S     |                  | GCTTCGATACGATCAAAATCACCTGAGTGAGAACATAAATTTTTTTGCTTTTTTA            |                 | EMSA                              |
| <i>ProGhCKI B1-EMSA</i> -A     |                  | TAAAAAAGCAAAAAAAATTTATGTTCTCACTCAGGTGATTTGATCGTATCGAAGC            |                 |                                   |
| <i>ProGhCKI B2-EMSA</i> -S     |                  | GAGATTGAAAATTAAGCTAATTTATTTGTTTITTTTAGATAGTGATAGGAAAAAA            |                 | EMSA                              |
| <i>ProGhCKI B2-EMSA</i> -A     |                  | TTTTTCTCTACTATCTAAAAAACAATAAATAGCTTAATTTCAATCTC                    |                 |                                   |
| <i>ProGhCKI B3-EMSA</i> -S     |                  | ATAGAATTATGATTTCGTAGCTACTTTCTCTCTTTCTTTCTTCGATTTAGATT              |                 | EMSA                              |
| <i>ProGhCKI B3-EMSA</i> -A     |                  | AATCTAAATGCGAAGAAGAAAGAGAGGAGGAAAAAGTAGCTACGAAATCATAATTCAT         |                 |                                   |
| <i>ProGhCKI B4-EMSA</i> -S     |                  | AGCCTAACCTAACCTAGGTTTTTTTTTGGTGTCTTGTTAATTTGTAT                    |                 | EMSA                              |
| <i>ProGhCKI B4-EMSA</i> -A     |                  | ATACAAAATTAACAAGAACACCAAAAAAAACCTAGGGTTAGGTTAGGCT                  |                 |                                   |
| <i>ProGhCKI B5-EMSA</i> -S     |                  | TTGTTTGTGGTTTAAGGTAAGACGGAATTTAGGTTTCTCTCC                         |                 | EMSA                              |
| <i>ProGhCKI B5-EMSA</i> -A     |                  | GGAGAAAAACCTAGAAATTCGCTCTTTACCTTAAACCCACAAACAA                     |                 |                                   |
| <i>ProGhCKI B6-EMSA</i> -S     |                  | CTTCTTTATTTATTTTATTTTATAGATTTTTTACTTGATTGATC                       |                 | EMSA                              |
| <i>ProGhCKI B6-EMSA</i> -A     |                  | GATCAATCAAGTAAAAAAATCTAAAAAAATAAAATAAAAGAAG                        |                 |                                   |
| <i>ProGhCKI B3-1-EMSA</i> -S   |                  | ATAGAATTATGATTTCGTAGCTACTTTCTCTCTTTCTTCTT                          |                 | EMSA                              |
| <i>ProGhCKI B3-1-EMSA</i> -A   |                  | AAGAAAGAAAAGGAGGAAAAGTAGCTACGAAATCATAATTCAT                        |                 |                                   |
| <i>ProGhCKI B3-2-EMSA</i> -S   |                  | ATAGAATTATGATTTCGTAGCTACTTTCTCTCTTT                                |                 | EMSA                              |
| <i>ProGhCKI B3-2-EMSA</i> -A   |                  | AAAAGGAGGAAAAGTAGCTACGAAATCATAATTCAT                               |                 |                                   |
| <i>ProGhCKI B3-3-EMSA</i> -S   |                  | ATAGAATTATGATTTCGTAGCTACTTTTCC                                     |                 | EMSA                              |
| <i>ProGhCKI B3-3-EMSA</i> -A   |                  | GGAAAAGTAGCTACGAAATCATAATTCAT                                      |                 |                                   |
| <i>ProGhCKI B3-4-EMSA</i> -S   |                  | ATAGAATTATGATTTCGTAGCTA                                            |                 | EMSA                              |
| <i>ProGhCKI B3-4-EMSA</i> -A   |                  | TAGCTACGAAATCATAATTCAT                                             |                 |                                   |
| <i>GhCKI-CF</i> -F             |                  | TCCCACCGCGGATCGCCATGGAACCTTGTGTGGTAA                               |                 | Cell-free expression              |
| <i>GhCKI-CF</i> -R             |                  | CCGAGCTCGAATTCGTTTAAACATTAATAGTGAATTCCTCGTCGC                      |                 |                                   |
| <i>ProGhCKI-LUC</i> -F         |                  | CGaagcttAATTACTTTTTTATAATTACAAAG                                   | <i>Hind</i> III | DLR                               |
| <i>ProGhCKI-LUC</i> -R         |                  | TAgctgacCAATCAACTTCAAAATAAGTAATTTAAA                               | <i>Sal</i> I    |                                   |
| <i>GhCKI-VC</i> -F             |                  | tcACTAGTATGGAACCTTGTGTGGTAATAAG                                    | <i>Spe</i> I    | BiFC                              |
| <i>GhCKI-VC</i> -R             |                  | atCCCCGGTTAATAGTGAATTCCTCGTCGCC                                    | <i>Xma</i> I    | BiFC                              |
| <i>Lov</i> -F                  |                  | GGGGACAAGTTTGTACAAAAAAGCAGGCTACAAGGAGAGACAGATGGAACGTGGA            | <i>att</i> B1   | GhLEC1 overexpression             |
| <i>Lov</i> -R                  |                  | GGGGACCAC <u>TTTGTACAAGA</u> AAGCTGGGTGAGACCGCGGCCTCATTTATG        | <i>att</i> B2   |                                   |
| <i>GhLEC1</i> -RT-F            |                  | GCCAACCATACGAACAGCCAC                                              |                 | RT-PCR, qRT-PCR                   |
| <i>GhLEC1</i> -RT-R            |                  | GGACACACATTCTGGATCGTTT                                             |                 |                                   |
| <i>GhLEC1-pDEST22</i> -F       |                  | GGGGACAAGTTTGTACAAAAAAGCAGGCTACAAGGAGAGACAGATGGAACGTGGA            | <i>att</i> B1   | Y1H                               |
| <i>GhLEC1-pDEST22</i> -R       |                  | GGGGACCAC <u>TTTGTACAAGA</u> AAGCTGGGTGAGACCGCGGCCTCATTTATG        | <i>att</i> B2   |                                   |
| <i>GhLEC1-pET-28a</i> -F       |                  | GGGGACAAGTTTGTACAAAAAAGCAGGCTACAAGGAGAGACAGATGGAACGTGGA            | <i>att</i> B1   | GhLEC1 induced expression         |
| <i>GhLEC1-pET-28a</i> -R       |                  | GGGGACCAC <u>TTTGTACAAGA</u> AAGCTGGGTGAGACCGCGGCCTCATTTATG        | <i>att</i> B2   |                                   |
| <i>GhLEC1-GAL4BD</i> -F        |                  | TCCCCCGGGCTGCAGGCCATGGAACGTGGAGGCTTCC                              | <i>Eco</i> RI   | 35S-GhLEC1 for DLR                |
| <i>GhLEC1-GAL4BD</i> -R        |                  | AAGCTTGATATCGAATTTTCATTTATGCTGCTGGGCATATGG                         |                 |                                   |
| <i>GhTCP15-pj3k</i> -F         |                  | TCCCCACCGCGGATCGCCATGATCATGGACGGCGAAAAATGGG                        |                 |                                   |
| <i>GhTCP15-pj3k</i> -R         |                  | CCGAGCTCGAATTCGTTTAAACACTAGTACTTGAATCATGCCTATG                     |                 |                                   |
| <i>GhTCP15-GAL4BD</i> -F       |                  | TCCCCCGGGCTGCAGGCCATGATCATGGACGGCGAAAAAT                           | Infusion        |                                   |
| <i>GhTCP15-GAL4BD</i> -R       |                  | AAGCTTGATATCGAATTTCTAGCTACTTGAATCATGCCTATG                         |                 |                                   |
| <i>GhTCP15-pDEST22</i> -F      |                  | GGGGACAAGTTTGTACAAAAAAGCAGGCTGGATGATCATGGACGGCGAAAAAT              | <i>att</i> B1   | Y2H                               |
| <i>GhTCP15-pDEST22</i> -R      |                  | GGGGACCAC <u>TTTGTACAAGA</u> AAGCTGGGTCTAGCTACTTGAATCATGCCTATG     | <i>att</i> B2   | GhTCP15 induced expression        |
| <i>GhTCP15-VN</i> -F           |                  | CCTACTAGTGGATCCGTGATGATCATGGACGGCGAAAAATGGG                        | Infusion        | BiFC                              |
| <i>GhTCP15-VN</i> -R           |                  | CGGTACCCTCGAGGTCGACTAGCTACTTGAATCATGCCTATG                         |                 |                                   |
| <i>ProPIF4-LUC</i> -F          |                  | ACCATGATTACGCCAAGCTTTTTTGTCTCCATTACAGTATCT                         | Infusion        | DLR                               |
| <i>ProPIF4-LUC</i> -R          |                  | GGCGTCTTCATGGTCGACGGGTCATAAACTGGAATTCAGAG                          |                 |                                   |

|                           |                                                              |                |
|---------------------------|--------------------------------------------------------------|----------------|
| <i>ProGhPIF4</i> -EMSA-S  | ATTTTGGACCTAATCTGATCTGATCTGGTCCCACTTTAAAATTACAAACCCCTTAATCA  | EMSA           |
| <i>ProGhPIF4</i> -EMSA-A  | TGATTAAAGGGGTTTGTAATTTTAAAGTGGGACCAGATCAGATCAGATTAGGTCCAAAAT |                |
| <i>mProGhPIF4</i> -EMSA-S | ATTTTGGACCTAATCTGATCTGATCTAACTTTGTTTTTAAAATTACAAACCCCTTAATCA | EMSA           |
| <i>mProGhPIF4</i> -EMSA-A | TGATTAAAGGGGTTTGTAATTTTAAACAAAGTTAGATCAGATCAGATTAGGTCCAAAAT  |                |
| AtCKL1-F                  | At4g26100 TTCTGGATTGCTGGTGCGGCTGA                            | qRT-PCR        |
| AtCKL1-R                  | CTTGTTCCCCACACGAGGTTCCATAAATA                                | qRT-PCR        |
| AtCKL2-F                  | At1g72710 GCGACAACCTCTTCCTTCAATCCCTTT                        | qRT-PCR        |
| AtCKL2-R                  | CACCACTCGAATCCAAGAGCTTCACCT                                  | qRT-PCR        |
| AtCKL7-F                  | At5g44100 TGAATTGGAAAACAGATCCAGGGGCTA                        | qRT-PCR        |
| AtCKL7-R                  | CAAGCTTAAATTTCCACCGATCACGAG                                  | qRT-PCR        |
| AtCKL8-F                  | At5g43320 CAGCTCGTCCCTGACCCAACCACTAG                         | qRT-PCR        |
| AtCKL8-R                  | TCCATCCATTAATAATGTCGCAGTGTCTT                                | qRT-PCR        |
| AtPGA6-F                  | At2g17950 GCACGGTGAAGATCACATCAACG                            | RT-PCR         |
| AtPGA6-R                  | TAGCGAAGCATAGTTGTGAACATACGA                                  |                |
| AtBBM-F                   | At5g17430 TCACCTCGAAGCTTTCACC                                | RT-PCR         |
| AtBBM-R                   | TCTTGCTCGTCATGTGCTT                                          |                |
| AtABI3-F                  | At3g24650 GACAAAAACAAGTCGAAAGGAACA                           | RT-PCR         |
| AtABI3-R                  | CACACTCGGGTACGCTGCCATT                                       |                |
| AtFUS3-F                  | At3g26790 TTA CTCCAAGTTTCGGAACATTTCG                         | RT-PCR         |
| AtFUS3-R                  | TCACCATCAAGAATACCATGAGCC                                     |                |
| AtLEC1-F                  | ACTACCAAAACGGGTCTCGGG                                        | RT-PCR         |
| AtLEC1-R                  | GAAATACAACACTTTTCTTAAAGAACG                                  |                |
| GhYUC2-F                  | ES810487 GGCTGTGGGAATTCAGGCAT                                | qRT-PCR/RT-PCR |
| GhYUC2-R                  | GAGGATTCAACAGTGGCGCA                                         |                |
| GhYUC5-F                  | DT569171 GCTGAGTTCGGCGGTGAAA                                 | qRT-PCR/RT-PCR |
| GhYUC5-R                  | GAGCTGCGAACCACCATGA                                          |                |
| GhPIF4-F                  | TTCTCCCAAAATTAACTTATCGTTG                                    | qRT-PCR/RT-PCR |
| GhPIF4-R                  | CATGGCATGTCTCGTGACCTCA                                       |                |
| GhPIF5-F                  | CCCATCAAGATTCCAACCAAGC                                       | qRT-PCR/RT-PCR |
| GhPIF5-R                  | GCCTAGAAATAGACATGAATGCCCTG                                   |                |
| GhPIF6-F                  | TACTCAACGCCAATTCCATTCTCA                                     | qRT-PCR/RT-PCR |
| GhPIF6-R                  | TTACCATTAATGCGGGTGAAGTCG                                     |                |
| GhABI3-F                  | TGCAAGGACAGACTTATCAACG                                       | RT-PCR         |
| GhABI3-R                  | ATCCTTCCAAGATTGCCAC                                          |                |
| GhLEC2-F                  | CGAAGAAGGCAACGACAACAG                                        | RT-PCR         |
| GhLEC2-R                  | GTGAACCATAAGTAGAATCCATAGGC                                   |                |
| GhFUS3-F                  | ACATCCAATAAGCCCAAACGC                                        | RT-PCR         |
| GhFUS3-R                  | CACCCAAGAAATGCTTGACGA                                        |                |
| AtYUC2-F                  | At4g13260 AGCCATTGATGCCAAGAAGA                               | qRT-PCR        |
| AtYUC2-R                  | AATCCAAACTTGCCAAATCG                                         |                |
| AtYUC5-F                  | At5g43890 GCTGGATTACAAGGAAAGGAT                              | qRT-PCR        |
| AtYUC5-R                  | CGGTGACCCACTCTGTGTCT                                         |                |
| CYCA3;2-F                 | At1g47210 TGAAGTTTGTGCCGTCTCTGTTGG                           | qRT-PCR        |
| CYCA3;2-R                 | TCCAAGGATGTTGTTTCGGACGGA                                     |                |
| CYCD3;2-F                 | At5g67260 CTCAGCTTGTGTGCTTGGCTTCTT                           | qRT-PCR        |
| CYCD3;2-R                 | AGAGATTGGAGTCACAGGGTGCAT                                     |                |
| CYCD3;3-F                 | At3g50070 TGCATCTGTGACTCCAATCTCGT                            | qRT-PCR        |
| CYCD3;3-R                 | TGCAGTGGCTAACACAGAAGGACT                                     |                |
| GhUB7-F                   | DQ116441 GAAGGCATTCCACCTGACCAAC                              | RT-PCR         |
| GhUB7-R                   | CTTGACCTTCTTCTTGTGTCTTG                                      |                |
| AtACT7-F                  | At5g09810 CCAGGAATTGCTGACCGTATGAG                            | qRT-PCR/RT-PCR |
| AtACT7-R                  | TGTTGGAAGTGCTGAGGGATG                                        |                |
